# Supplementary material for: Deep exploration of a CDKN1C mutation causing a mixture of Beckwith-Wiedemann and IMAGe syndromes revealed a novel transcript associated with developmental delay
Source: PubMed Central journal article supplement — J Med Genet. 2020 Dec 21;59(2):155–64. doi: 10.1136/jmedgenet-2020-107401 (PMC8788247; doi:10.1136/jmedgenet-2020-107401), 2020-12-21
Supplement: jmedgenet-2020-107401supp001.pdf [file jmedgenet-2020-107401supp001.pdf]

**SUPPLEMENTARY FILE**

- 1. *CDKN1C* Primer Sequences qPCR and sequencing of cDNA**
- 2. RNA-Seq alignment**
- 3. Haplotype analysis**
- 4. RNA-seq, IGV-view**

**Supplementary 1: Primers***CDKN1C* Primer sequences used for RNA-sequencing (cDNA):

|           |                          |
|-----------|--------------------------|
| CDKN1C-F1 | CAGGAGCCTCTCGCTGAC       |
| CDKN1C-F2 | TGTCCGGGCCTCTGATCTCCGAG  |
| CDKN1C-F3 | TGTCCGGGCCTCTGATCTCCGCTG |
| CDKN1C-R1 | TTTGGGCTCTAAATTGGCTCAC   |
| CDKN1C-R2 | ACCGAACGCTGCTCTGCGGCA    |
| CDKN1C-R3 | AGCCGCCGC                |

For analysis of *CDKN1C-201* and *CDKN1C-206* (XM\_005252732.4, ENS00000647521.1) that encodes a putative 175aa protein product labeled isoform C (UniProtKB A0A2R8YFP9), we also used the following primers:

|                        |                         |
|------------------------|-------------------------|
| CDKN1C-201/206-5UTRex1 | GGACAGCCAGCACATCCACGATG |
| CDKN1C-201/206-5UTR    | GACGCAGAAGAGTCCACCACC   |

RealTime-probes for RNA expression (qPCR):

|                     |                                                   |
|---------------------|---------------------------------------------------|
| Hs 00175938_m1      | CDKN1C(NM_000076.2)                               |
| Hs 00908985_m1      | CDKN1C-206                                        |
| APZTEAZ             | CDKN1C(NM_000076.2) specific mutation probe)      |
| Hs 00187842_m1      | B2M reference probe                               |
| 20170628_CDKN1C.sds | Probe specific for 206-transcript: XM_005252732.4 |

## Supplementary 2: Alignment used for generating FASTA files used as designated reference files for mapping the complex delins variant.

The two ref seq files were aligned using EMBOSS NEEDLE to illustrate where the delins is in the sequence (see line # 901 in the alignment file), deleted nucleotides are marked in green in RefSeq, and inserted nucleotides in red). Alignment parameters are included at the top of the file.

```
#####
# Program: needle
# Rundate: Wed 22 Jan 2020 06:51:17
# Commandline: needle
#
# -auto
# -stdout
# -asequence emboss_needle-I20200122-065114-0865-20608599-p2m.asequence
# -bsequence emboss_needle-I20200122-065114-0865-20608599-p2m.bsequence
# -datafile EDNAFULL
# -gapopen 10.0
# -gapextend 0.5
# -endopen 10.0
# -endextend 0.5
# -aformat3 pair
# -snucleotide1
# -snucleotide2
# Align_format: pair
# Report_file: stdout
#####

#=====
#
# Aligned_sequences: 2
# 1: CDKN1C_RefSeq_B38
# 2: CDKN1C_DelIns
# Matrix: EDNAFULL
# Gap_penalty: 10.0
# Extend_penalty: 0.5
#
# Length: 2802
# Identity: 2798/2802 (99.9%)
# Similarity: 2798/2802 (99.9%)
# Gaps: 1/2802 ( 0.0%)
# Score: 13968.0
#
#
#=====

CDKN1C_RefSeq 1 AGCACAAACAGACTGGAGTTGCAGCATTTTTTCGGCCTCTTTATTTAGAAC 50
|||||
CDKN1C_DelIns 1 AGCACAAACAGACTGGAGTTGCAGCATTTTTTCGGCCTCTTTATTTAGAAC 50

CDKN1C_RefSeq 51 CCGGCGGACGAGGGGCCGGGGCAGTGGTACAGACGGCTCAGGAACCATT 100
|||||
CDKN1C_DelIns 51 CCGGCGGACGAGGGGCCGGGGCAGTGGTACAGACGGCTCAGGAACCATT 100

CDKN1C_RefSeq 101 TAACAGACTTGTCTTCAAGTTTCAGATAAACACAGTCATAATAAGAGAGA 150
|||||
CDKN1C_DelIns 101 TAACAGACTTGTCTTCAAGTTTCAGATAAACACAGTCATAATAAGAGAGA 150

CDKN1C_RefSeq 151 CAGCGAAAGCGCGAAGAGACTGCAAGCTAGATGGGCATGTATGGCAGCTA 200
|||||
CDKN1C_DelIns 151 CAGCGAAAGCGCGAAGAGACTGCAAGCTAGATGGGCATGTATGGCAGCTA 200

CDKN1C_RefSeq 201 CAGCTTGTGAGTGACCCCTTCCCCAGAGTCCGCGATGAAAATAAAGTTA 250
|||||
CDKN1C_DelIns 201 CAGCTTGTGAGTGACCCCTTCCCCAGAGTCCGCGATGAAAATAAAGTTA 250

CDKN1C_RefSeq 251 CACTTGTCAATAACCAGATGTGGGAGATGGAGAGTGCCTTTGGCATAACC 300
|||||
CDKN1C_DelIns 251 CACTTGTCAATAACCAGATGTGGGAGATGGAGAGTGCCTTTGGCATAACC 300

CDKN1C_RefSeq 301 AATAACCGAGCTAGTGCCTGGCAGAGCGGTCCACGCCTGGACATAAATAG 350
|||||
CDKN1C_DelIns 301 AATAACCGAGCTAGTGCCTGGCAGAGCGGTCCACGCCTGGACATAAATAG 350

CDKN1C_RefSeq 351 AAAATATAAGTTAGTATAAAGCTTTAAAAAAGCTTTTGTACAAATATACATGG 400
|||||
```

|               |      |                                                      |      |
|---------------|------|------------------------------------------------------|------|
| CDKN1C_DelIns | 351  | AAAATATAAGTTAGTATAAAGCTTTAAAAACTTTTTGTACAAATATACATGG | 400  |
| CDKN1C_RefSeq | 401  | TTTTTTTATTTTTCTTTTTTTTTCTTTTTCTTTTTTTGCACTGAG        | 450  |
| CDKN1C_DelIns | 401  | TTTTTTTATTTTTCTTTTTTTTTCTTTTTCTTTTTTTGCACTGAG        | 450  |
| CDKN1C_RefSeq | 451  | TTTCAGCAGAGATTAACATTTTATATAAATGACTCTTAAAGCTTTACAC    | 500  |
| CDKN1C_DelIns | 451  | TTTCAGCAGAGATTAACATTTTATATAAATGACTCTTAAAGCTTTACAC    | 500  |
| CDKN1C_RefSeq | 501  | CTTGGGACCAGTGTACCTTCTCGTGCAGAATACATTTAGATATAAAAAGA   | 550  |
| CDKN1C_DelIns | 501  | CTTGGGACCAGTGTACCTTCTCGTGCAGAATACATTTAGATATAAAAAGA   | 550  |
| CDKN1C_RefSeq | 551  | CGTTATTAATACATTGCACAGTTTTCAAATTTAAAAACAAAACCGAACG    | 600  |
| CDKN1C_DelIns | 551  | CGTTATTAATACATTGCACAGTTTTCAAATTTAAAAACAAAACCGAACG    | 600  |
| CDKN1C_RefSeq | 601  | CTGCTCTGCGGCAGCCGCGCGGTTGCTGCTACATGAACGGTCCAGCC      | 650  |
| CDKN1C_DelIns | 601  | CTGCTCTGCGGCAGCCGCGCGGTTGCTGCTACATGAACGGTCCAGCC      | 650  |
| CDKN1C_RefSeq | 651  | GAGGCCAGCGCCCTTCCAACGTCCGCTGCCCGGCAGGTTCCCTCGGGG     | 700  |
| CDKN1C_DelIns | 651  | GAGGCCAGCGCCCTTCCAACGTCCGCTGCCCGGCAGGTTCCCTCGGGG     | 700  |
| CDKN1C_RefSeq | 701  | CTCTTTGGGCTCTAAACTGCGAGGAGAGGGGCGGTCAGCAAAGCCGGCGG   | 750  |
| CDKN1C_DelIns | 701  | CTCTTTGGGCTCTAAACTGCGAGGAGAGGGGCGGTCAGCAAAGCCGGCGG   | 750  |
| CDKN1C_RefSeq | 751  | GGACCCGGCGGGTCCGGCCCTCCGCGCCCCCAGGTGCGCTGTACTACT     | 800  |
| CDKN1C_DelIns | 751  | GGACCCGGCGGGTCCGGCCCTCCGCGCCCCCAGGTGCGCTGTACTACT     | 800  |
| CDKN1C_RefSeq | 801  | TGGCTCACCGAGCCTTGTGCGGGGTCTGCTCCACCGAGCCACGCCA       | 850  |
| CDKN1C_DelIns | 801  | TGGCTCACCGAGCCTTGTGCGGGGTCTGCTCCACCGAGCCACGCCA       | 850  |
| CDKN1C_RefSeq | 851  | GGGGCGGCGCTTGAGAGGGACACGGCGGGGACATCGCCCGACGACTT      | 900  |
| CDKN1C_DelIns | 851  | GGGGCGGCGCTTGAGAGGGACACGGCGGGGACATCGCCCGACGACTT      | 900  |
| CDKN1C_RefSeq | 901  | CTCAGGCGCTGATCTCTTGGCGTTGGCGA-AGAAATCTGCGGGCAGACG    | 949  |
| CDKN1C_DelIns | 901  | CTCAGGCGCTGATCTCTTGGCGTTGGCGAAGCTCTCTGCGGGCAGACG     | 950  |
| CDKN1C_RefSeq | 950  | GCGCGCGGCGGTCAGGGCGGGGCCGGCCCGGAGACCCGAGAGGGGGCCG    | 999  |
| CDKN1C_DelIns | 951  | GCGCGCGGCGGTCAGGGCGGGGCCGGCCCGGAGACCCGAGAGGGGGCCG    | 1000 |
| CDKN1C_RefSeq | 1000 | GGAGAGGGCGCGGGGCGCGGGCCGGCCGGGTGGGGGCGCGTCCCGCC      | 1049 |
| CDKN1C_DelIns | 1001 | GGAGAGGGCGCGGGGCGCGGGCCGGCCGGGTGGGGGCGCGTCCCGCC      | 1050 |
| CDKN1C_RefSeq | 1050 | CGCGCCGAGTCCGCGGGGTCAGCTTTGTTTACGTGCGCGCAATGT        | 1099 |
| CDKN1C_DelIns | 1051 | CGCGCCGAGTCCGCGGGGTCAGCTTTGTTTACGTGCGCGCAATGT        | 1100 |
| CDKN1C_RefSeq | 1100 | GCTGTGTAAGCATTTCCCTTTGTCCCGGGCAAGCCCCGGGGCCGCC       | 1149 |
| CDKN1C_DelIns | 1101 | GCTGTGTAAGCATTTCCCTTTGTCCCGGGCAAGCCCCGGGGCCGCC       | 1150 |
| CDKN1C_RefSeq | 1150 | GCCGCGCTTAACCCCTCCACGCCGTGCTACGGCGCCGGCCGCGCCG       | 1199 |
| CDKN1C_DelIns | 1151 | GCCGCGCTTAACCCCTCCACGCCGTGCTACGGCGCCGGCCGCGCCG       | 1200 |
| CDKN1C_RefSeq | 1200 | GGGAGGGGCTCCCGCGGCGGGGGCGAAAACTGCGCTCCGGGGGTGCG      | 1249 |
| CDKN1C_DelIns | 1201 | GGGAGGGGCTCCCGCGGCGGGGGCGAAAACTGCGCTCCGGGGGTGCG      | 1250 |
| CDKN1C_RefSeq | 1250 | GGCCGGGATTACGCTCCACCCCGCCGCGGAAGCCGCTGGAGGGCAC       | 1299 |
| CDKN1C_DelIns | 1251 | GGCCGGGATTACGCTCCACCCCGCCGCGGAAGCCGCTGGAGGGCAC       | 1300 |
| CDKN1C_RefSeq | 1300 | AACAACGGGGCGGGAGGGGGTAAGGGCGCAGCCGCGCCTGAGCGCTG      | 1349 |

|               |      |                                                    |      |
|---------------|------|----------------------------------------------------|------|
| CDKN1C_DelIns | 1301 | AACAACGGGGCGGGAGGGGGTAAGGGCGCAGCCGCGCCCTGAGCGCTG   | 1350 |
| CDKN1C_RefSeq | 1350 | CGGGCCCTTAAATGCCACGGGAGGAGGCGGGAACCCAGCGAGGCCCCGA  | 1399 |
| CDKN1C_DelIns | 1351 | CGGGCCCTTAAATGCCACGGGAGGAGGCGGGAACCCAGCGAGGCCCCGA  | 1400 |
| CDKN1C_RefSeq | 1400 | GGGCTGGGGGACCGGCCGGCCGACAAAGCGGGGCGGGCCGGCCGGG     | 1449 |
| CDKN1C_DelIns | 1401 | GGGCTGGGGGACCGGCCGGCCGACAAAGCGGGGCGGGCCGGCCGGG     | 1450 |
| CDKN1C_RefSeq | 1450 | GCGGGCCCGTGCGGGGCTACCGGAGATCAGAGGCCGGACAGCTTCTTG   | 1499 |
| CDKN1C_DelIns | 1451 | GCGGGCCCGTGCGGGGCTACCGGAGATCAGAGGCCGGACAGCTTCTTG   | 1500 |
| CDKN1C_RefSeq | 1500 | ATCGCCGCGCCGTTGGCGCTGGCGGCCGCGGTGCCGGCCGCGGGACGTCC | 1549 |
| CDKN1C_DelIns | 1501 | ATCGCCGCGCCGTTGGCGCTGGCGGCCGCGGTGCCGGCCGCGGGACGTCC | 1550 |
| CDKN1C_RefSeq | 1550 | CGAAATCCCGAGTGCAGCTGGTCAGCGAGAGGCTCCTGGCCGCGCTGCC  | 1599 |
| CDKN1C_DelIns | 1551 | CGAAATCCCGAGTGCAGCTGGTCAGCGAGAGGCTCCTGGCCGCGCTGCC  | 1600 |
| CDKN1C_RefSeq | 1600 | CCTGGTTCGCGCCCTGCTCGGCGCTCTCTTGAGGCGCCGCTCGGGGCC   | 1649 |
| CDKN1C_DelIns | 1601 | CCTGGTTCGCGCCCTGCTCGGCGCTCTCTTGAGGCGCCGCTCGGGGCC   | 1650 |
| CDKN1C_RefSeq | 1650 | GGGGCCGGGGCGGGGCCGGGGCCGGGGCCGGGGCCGGGGCTGGGGCCGG  | 1699 |
| CDKN1C_DelIns | 1651 | GGGGCCGGGGCGGGGCCGGGGCCGGGGCCGGGGCCGGGGCTGGGGCCGG  | 1700 |
| CDKN1C_RefSeq | 1700 | GGCCGCGACTGGAGCCGGGGCCGGAGCCGGAGCCGGAGCCGGGGCCGGGG | 1749 |
| CDKN1C_DelIns | 1701 | GGCCGCGACTGGAGCCGGGGCCGGAGCCGGAGCCGGAGCCGGGGCCGGGG | 1750 |
| CDKN1C_RefSeq | 1750 | CCGGGGCCAGGACCGGACCGGAGCCGGAGCCGGAGCCGGAGCCGGAGCC  | 1799 |
| CDKN1C_DelIns | 1751 | CCGGGGCCAGGACCGGACCGGAGCCGGAGCCGGAGCCGGAGCCGGAGCC  | 1800 |
| CDKN1C_RefSeq | 1800 | GGAGCCGGAGCCGGGGCCGGGGCTGGAGCCAGGACCGGGACTGGGGGCGG | 1849 |
| CDKN1C_DelIns | 1801 | GGAGCCGGAGCCGGGGCCGGGGCTGGAGCCAGGACCGGGACTGGGGGCGG | 1850 |
| CDKN1C_RefSeq | 1850 | GGTGGACGCCGGGGCCGGGACCGGACACTAGGCAGCTGCTCCGGCGCCT  | 1899 |
| CDKN1C_DelIns | 1851 | GGTGGACGCCGGGGCCGGGACCGGACACTAGGCAGCTGCTCCGGCGCCT  | 1900 |
| CDKN1C_RefSeq | 1900 | CCTCGAGGCCGTCGAGGGACTCAGCGGCCGGCTCGAGGGGCGGGCTGACA | 1949 |
| CDKN1C_DelIns | 1901 | CCTCGAGGCCGTCGAGGGACTCAGCGGCCGGCTCGAGGGGCGGGCTGACA | 1950 |
| CDKN1C_RefSeq | 1950 | GCCACCGGACCGGACCGGCGCGGCCAGCAGCAGGCGGCAGCGCCC      | 1999 |
| CDKN1C_DelIns | 1951 | GCCACCGGACCGGACCGGCGCGGCCAGCAGCAGGCGGCAGCGCCC      | 2000 |
| CDKN1C_RefSeq | 2000 | CACCTGCACCGTCTCGCGGTAGAACGCGGGCACCGAGTCGCTGTCCACTT | 2049 |
| CDKN1C_DelIns | 2001 | CACCTGCACCGTCTCGCGGTAGAACGCGGGCACCGAGTCGCTGTCCACTT | 2050 |
| CDKN1C_RefSeq | 2050 | CGGTCCACTGCAGGCGTCCAGGGCCCCGAGCGGCATGTCCTGCTGGAAG  | 2099 |
| CDKN1C_DelIns | 2051 | CGGTCCACTGCAGGCGTCCAGGGCCCCGAGCGGCATGTCCTGCTGGAAG  | 2100 |
| CDKN1C_RefSeq | 2100 | TCGTAATCCAGCGGTTCTGGTCTCGGCGTTCAGCTCGGCCAGGCGGGC   | 2149 |
| CDKN1C_DelIns | 2101 | TCGTAATCCAGCGGTTCTGGTCTCGGCGTTCAGCTCGGCCAGGCGGGC   | 2150 |
| CDKN1C_RefSeq | 2150 | CTGCAGCTCGCGGCTCAGCTCCTCGTGGTCCACCGGCCGAAGAGGCTGC  | 2199 |
| CDKN1C_DelIns | 2151 | CTGCAGCTCGCGGCTCAGCTCCTCGTGGTCCACCGGCCGAAGAGGCTGC  | 2200 |
| CDKN1C_RefSeq | 2200 | GGCAGGCGCTGGTGCACACTAGTACTGGGAAGGTCCACGGGCGACAAGA  | 2249 |
| CDKN1C_DelIns | 2201 | GGCAGGCGCTGGTGCACACTAGTACTGGGAAGGTCCACGGGCGACAAGA  | 2250 |
| CDKN1C_RefSeq | 2250 | CGCTCCATCGTGGATGTGCTGCGGAGGGACGCGTCGGACATGGCCCGGG  | 2299 |

|               |      |                                                     |      |
|---------------|------|-----------------------------------------------------|------|
| CDKN1C_DelIns | 2251 | CGCTCCATCGTGGATGTGCTGCGGAGGGACGCGTCGGACATGGCCCGGGG  | 2300 |
| CDKN1C_RefSeq | 2300 | CTGCGCAAACGCGGGCAGCGAGAGAGGAGAGGACAGCGAGAAGAAGGGGA  | 2349 |
| CDKN1C_DelIns | 2301 | CTGCGCAAACGCGGGCAGCGAGAGAGGAGAGGACAGCGAGAAGAAGGGGA  | 2350 |
| CDKN1C_RefSeq | 2350 | AAGGAGAGGAGGAGAGGGCGGAGGCCGGGCGCAAGGGAGACCCCGCGCCG  | 2399 |
| CDKN1C_DelIns | 2351 | AAGGAGAGGAGGAGAGGGCGGAGGCCGGGCGCAAGGGAGACCCCGCGCCG  | 2400 |
| CDKN1C_RefSeq | 2400 | CCCGACTCTGCGTGTGCGAGGGACGCGGCGGCTACCTGGCTGTCCGGTGG  | 2449 |
| CDKN1C_DelIns | 2401 | CCCGACTCTGCGTGTGCGAGGGACGCGGCGGCTACCTGGCTGTCCGGTGG  | 2450 |
| CDKN1C_RefSeq | 2450 | TGGACTCTTCTGCGTCGGGTTTCGCCTGTCTCGTCCGGACGGCAGCCGCGC | 2499 |
| CDKN1C_DelIns | 2451 | TGGACTCTTCTGCGTCGGGTTTCGCCTGTCTCGTCCGGACGGCAGCCGCGC | 2500 |
| CDKN1C_RefSeq | 2500 | CCCCTCGATGCCTGTGGCTAGCTCGCTCGCTCAGGCCTGGCCGGCACCC   | 2549 |
| CDKN1C_DelIns | 2501 | CCCCTCGATGCCTGTGGCTAGCTCGCTCGCTCAGGCCTGGCCGGCACCC   | 2550 |
| CDKN1C_RefSeq | 2550 | CTCGAGCACAGCGCACTTGGCCTGTGGAACGCCAGCCCGCCTGCGCCCC   | 2599 |
| CDKN1C_DelIns | 2551 | CTCGAGCACAGCGCACTTGGCCTGTGGAACGCCAGCCCGCCTGCGCCCC   | 2600 |
| CDKN1C_RefSeq | 2600 | CTTTATACGCGCGGGCCACCCCGTGCAGCGCGGGCCCGGCCGCGATTA    | 2649 |
| CDKN1C_DelIns | 2601 | CTTTATACGCGCGGGCCACCCCGTGCAGCGCGGGCCCGGCCGCGATTA    | 2650 |
| CDKN1C_RefSeq | 2650 | GCATAATGTAGTATTTTCAGTTTCAACAACACCACGGCGATTGGCGGCCG  | 2699 |
| CDKN1C_DelIns | 2651 | GCATAATGTAGTATTTTCAGTTTCAACAACACCACGGCGATTGGCGGCCG  | 2700 |
| CDKN1C_RefSeq | 2700 | CCCCGCTGCCCGCCCGCCGCGGCGCCCGGCCCGCCGCGCACCGCCATTGG  | 2749 |
| CDKN1C_DelIns | 2701 | CCCCGCTGCCCGCCCGCCGCGGCGCCCGGCCCGCCGCGCACCGCCATTGG  | 2750 |
| CDKN1C_RefSeq | 2750 | CCGCGCGCACACCCACCGGGGGCGGGGCGGGGCGCGGGCCGGGGCGCGC   | 2799 |
| CDKN1C_DelIns | 2751 | CCGCGCGCACACCCACCGGGGGCGGGGCGGGGCGCGGGCCGGGGCGCGC   | 2800 |
| CDKN1C_RefSeq | 2800 | GG 2801                                             |      |
| CDKN1C_DelIns | 2801 | GG 2802                                             |      |

Supplementary 3: *CDKN1C* Haplotype analysis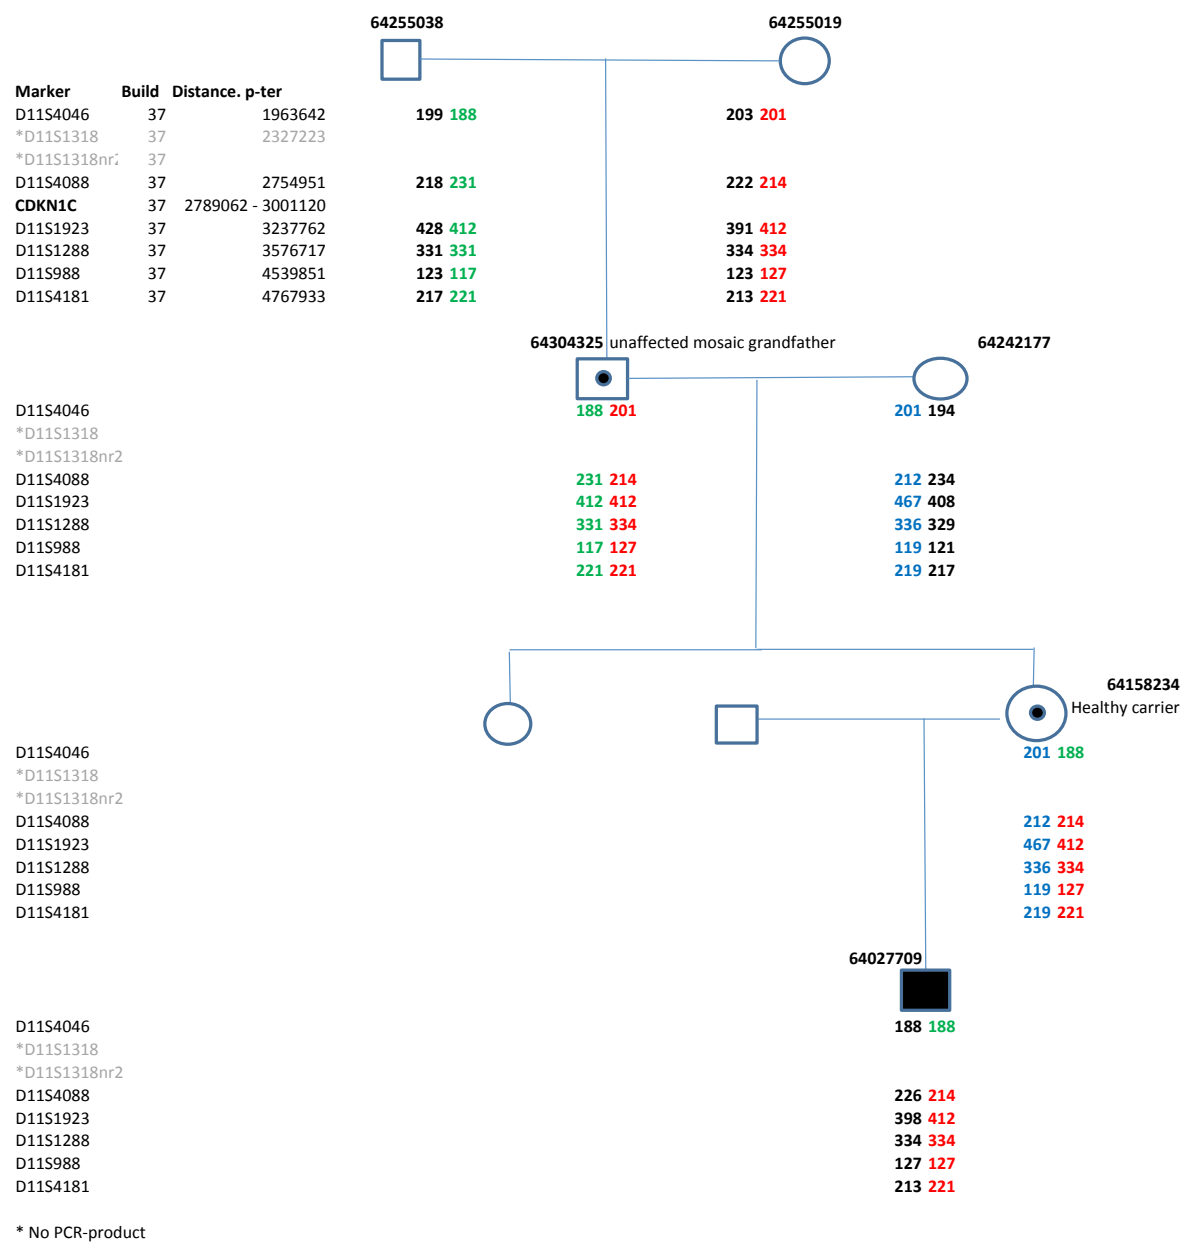**Result from haplotype analysis**

Haplotype analysis in the family with informative (simple tandem repeat) markers (to the left) confirm that the *de novo* *CDKN1C* delins in the maternal grandfather occurred on his maternal allele

### Supplementary 4. Results from *CDKN1C* RNA-sequencing displaying Splice Junctions Tracks

#### a RefSeq; index boy and healthy control (blood)

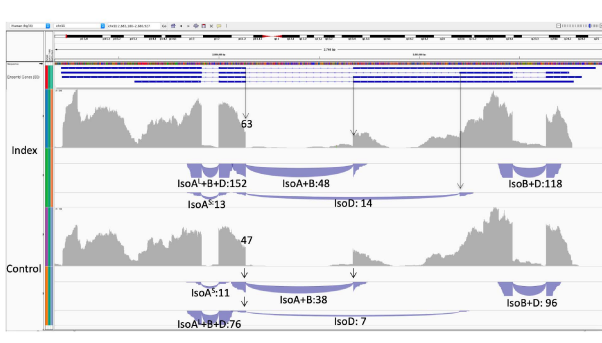

#### b Ref Seq; mother, maternal grandfather (blood) and index boy (fibroblasts)

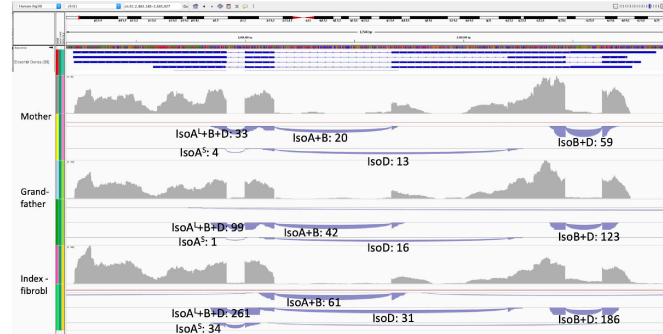

#### c Delins ref; index boy and control (blood)

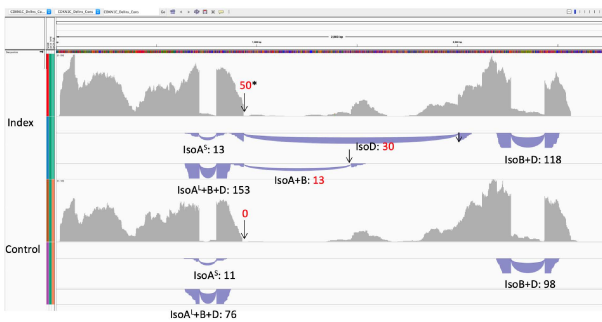

#### d Delins ref; mother, maternal grandfather (blood) and index boy (fibroblasts)

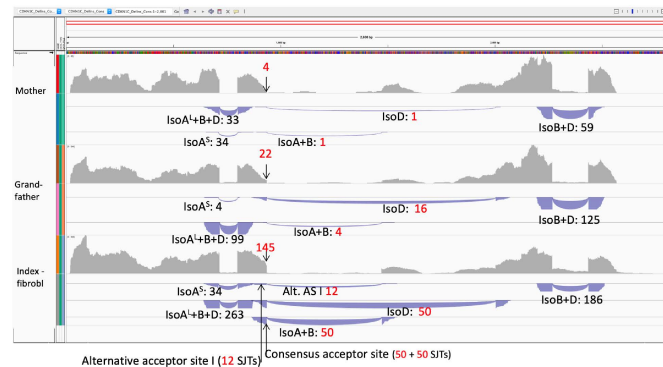

All results from RNAseq are presented in IGV (The Integrative Genomics Viewer). (a) and (b) represent mapping against reference sequence genome assembly GRCh38.p11. (c) and (d) were mapped against a FASTA file containing the delins variant, using the consensus splice site as reference.

Panel (a) and (c) show results from analysis of blood-derived RNA from index patient and a healthy control, while (b) and (d) show results from blood-derived RNA from the asymptomatic heterozygous mother, the mosaic grandfather, and at the bottom fibroblast-derived RNA from the index patient.

The four Ensembl transcripts are shown at the top; first *CDKN1C-202* (named IsoA<sup>L</sup> in the figure to ease reading), then *CDKN1C-201* (IsoD), followed by *CDKN1C-204* (IsoB) and *CDKN1C-203* (IsoA<sup>S</sup>). Isoform A (316aa) is encoded by two transcripts of different UTR-length, *CDKN1C-202* (L for "long") and *CDKN1C-203* (S for "short"). Where the two transcript can not be distinguished, the L/S is omitted. The transcripts are read from the reverse strand (from right to left in the figures). The junctions track displays arcs connecting alignment blocks from a single read. For RNA data these connections normally arise from splice junctions, called Splice Junction Track (SJT). Below each arc, the corresponding isoform (A, B or D) and the total number of (manually checked) SJTs are reported, with delins-containing reads in red. The total number of reads at specific points are marked by arrows. SJTs on the same line do not necessarily correspond to the same transcript.
